# Supplementary material
Source: PubMed Central journal article supplement (PMC5444020)
Supplement: mmc1.pdf [file mmc1.pdf]

**Biophysical Journal, Volume 112**

**Supplemental Information**

**Structural and Functional Investigations of the N-Terminal Ubiquitin  
Binding Region of Usp25**

**Yuanyuan Yang, Li Shi, Yiluan Ding, Yanhong Shi, Hong-Yu Hu, Yi Wen, and Naixia Zhang**

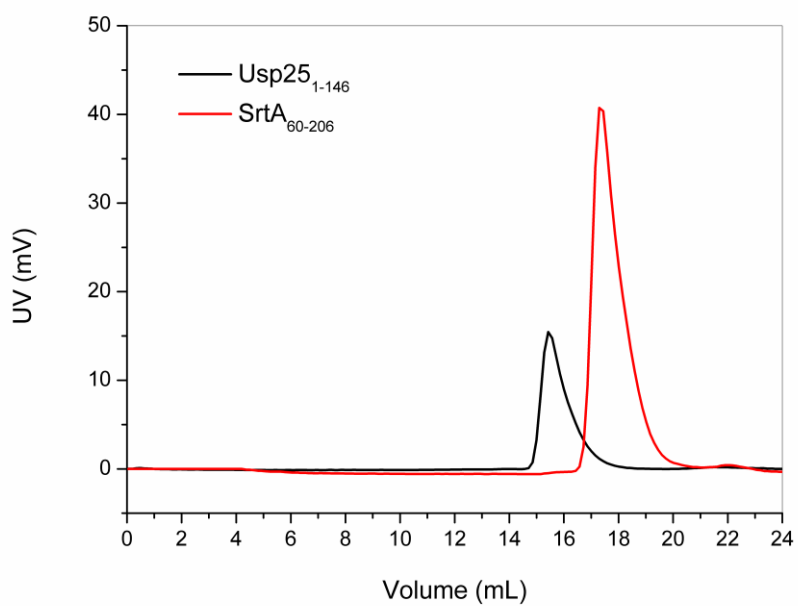

**Figure S1. Size-exclusion chromatography profiles of Usp25<sub>1-146</sub> and SrtA<sub>60-206</sub>.** These two proteins have comparable size and both are diluted to the concentration of 0.1 mM. Due to the lack of aromatic amino acid residues, Usp25<sub>1-146</sub> has a lower UV absorbance at 280 nm than SrtA<sub>60-206</sub>.

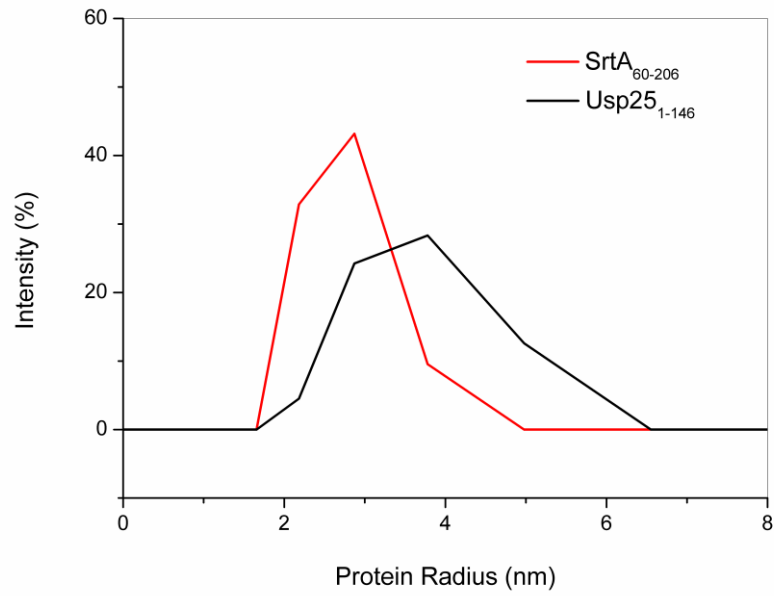

**Figure S2. Size distributions of Usp25<sub>1-146</sub> and SrtA<sub>60-206</sub> measured by DLS.** Both proteins are diluted to the concentration of 1 mg/mL. Usp25<sub>1-146</sub> has a hydrodynamic radius ( $R_h$ ) of ~3.6 nm, while SrtA<sub>60-206</sub> has a  $R_h$  of ~2.7 nm.

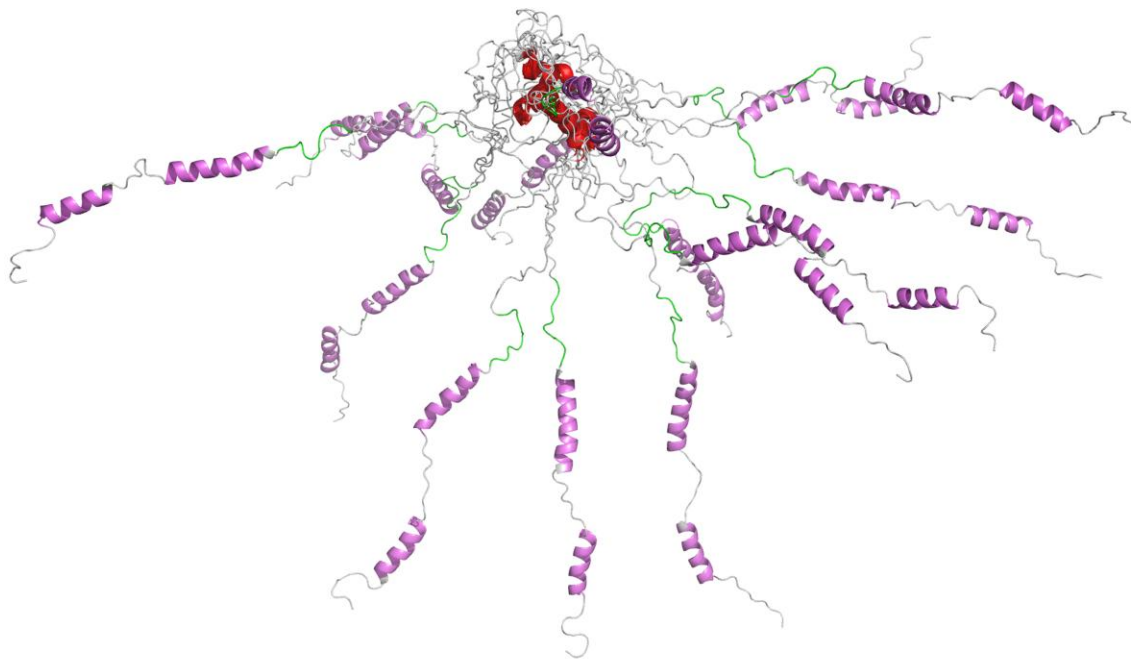

**Figure S3.** An ensemble of solution structures of Usp25<sub>1-146</sub>. UBA, SIM and UIM1/2 are colored in red, green and purple, respectively. UBA domain is aligned as the spatial reference.

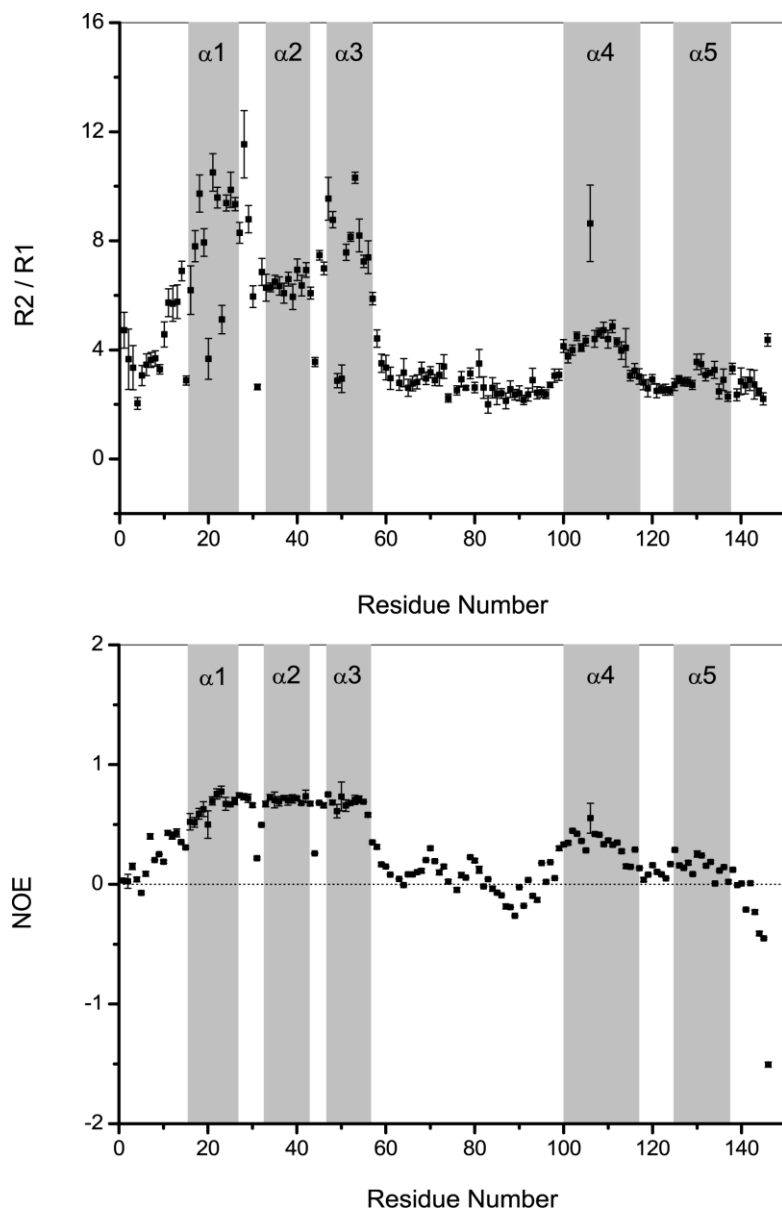

**Figure S4. Backbone dynamics of Usp25<sub>1-146</sub>.** The secondary structure elements are highlighted in grey.

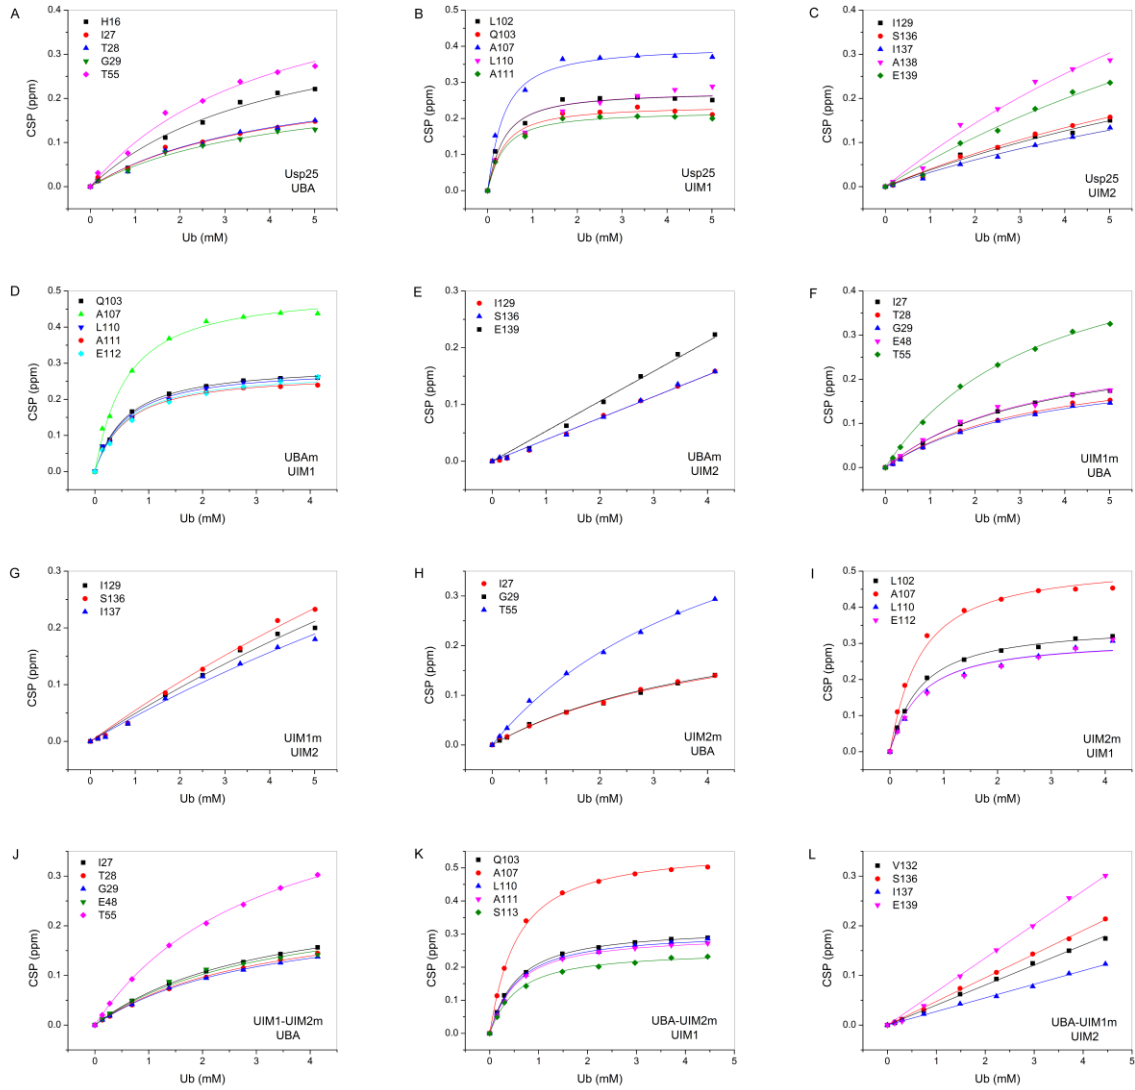

**Figure S5. Global fit for the binding of monoubiquitin to each domain/motif of Usp25 UBR or its variants.** Determined dissociation constants ( $K_d$ ) are summarized in Table 2.

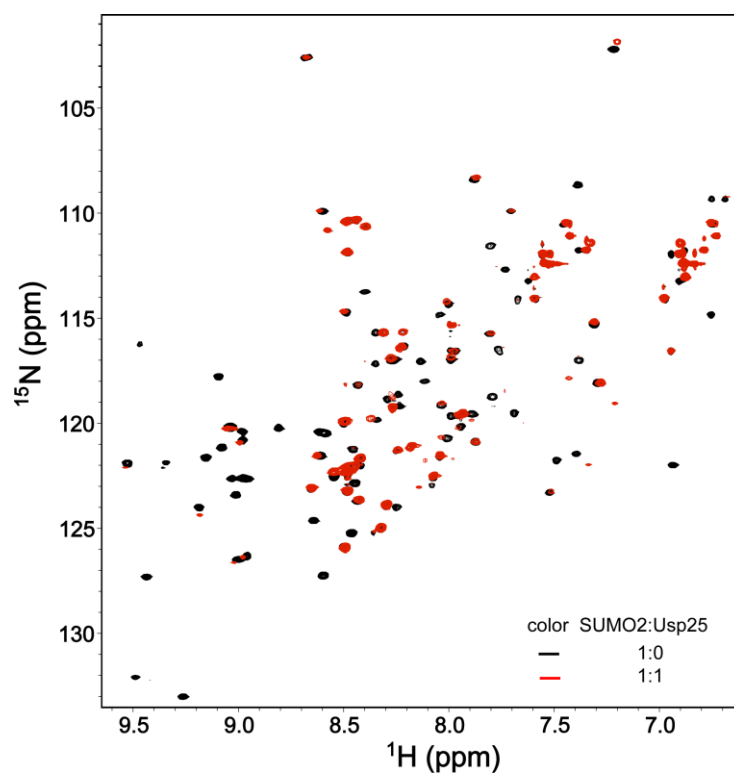

**Figure S6. Superimposed  $^1\text{H}$ - $^{15}\text{N}$  HSQC spectra of  $^{15}\text{N}$ -labeled SUMO2 without (black) and with equal molar of Usp25 UBR (red).**
